# Ignoring stratigraphic age uncertainty leads to erroneous estimates of species divergence times under the fossilized birth-death process

Joëlle Barido-Sottani<sup>1,2,\*</sup>, Gabriel Aguirre-Fernández<sup>3</sup>, Melanie Hopkins<sup>4</sup>, Tanja Stadler<sup>1,2</sup>, and Rachel Warnock<sup>1,2,3</sup>

<sup>1</sup>*Department of Biosystems Science and Engineering, ETH Zürich, Basel, Switzerland*

<sup>2</sup>*Swiss Institute of Bioinformatics (SIB), Switzerland*

<sup>3</sup>*Palaeontological Institute and Museum, University of Zurich, Zurich, Switzerland*

<sup>4</sup>*Division of Paleontology, American Museum of Natural History, New York, USA*

\*Correspondence to be addressed to: [joelle.barido-sottani@m4x.org](mailto:joelle.barido-sottani@m4x.org)

## Abstract

Fossil information is essential for estimating species divergence times, and can be integrated into Bayesian phylogenetic inference using the fossilized birth-death (FBD) process. An important aspect of palaeontological data is the uncertainty surrounding specimen ages, which can be handled in different ways during inference. The most common approach is to fix fossil ages to a point estimate within the known age interval. Alternatively, age uncertainty can be incorporated by using priors, and fossil ages are then directly sampled as part of the inference. This study presents a comparison of alternative approaches for handling fossil age uncertainty in analysis using the FBD process. Based on simulations, we find that fixing fossil ages to the midpoint or a random point drawn from within the stratigraphic age range leads to biases in divergence time estimates, while sampling fossil ages leads to estimates that are similar to inferences that employ the correct ages of fossils. Second, we show a comparison using an empirical dataset of extant and fossil cetaceans, which confirms that different methods of handling fossil age uncertainty lead to large differences in estimated node ages. Stratigraphic age uncertainty should thus not

<sup>27</sup> be ignored in divergence time estimation and instead should be incorporated explicitly.

# 1 Introduction

The fossil record provides essential evidence for calibrating species trees to time, as molecular sequences from extant species are informative about the relative age of species but do not typically provide information about the absolute age. A common approach to calibration, referred to as node dating, is to assign a single fossil to a specific node in a phylogeny and to reflect the uncertainty in its age using a probability distribution, where the minimum bound of the distribution corresponds to the age of the specimen (1; 2; 3). It has been shown that divergence time estimates are extremely sensitive to the choice of fossil(s), the age assigned to fossil specimens, and the distribution chosen to model uncertainty (4; 5; 6; 7; 8). However, regardless of specimen choice, node dating has additional drawbacks. For instance, this approach effectively uses one fossil per node and makes it extremely challenging to derive or implement explicit priors on divergence times (9; 10). The fossilized birth-death (FBD) process offers an alternative approach to calibration, which integrates fossil samples into the tree under the same diversification process that describes extant species (11; 12). This approach greatly increases the amount of fossil evidence that can be used during inference, but the impact of the taxonomic, stratigraphic range, and stratigraphic age uncertainty has not been fully explored using this framework.

Here, we explore the impact of stratigraphic age uncertainty. Fossils are rarely composed of material that can be directly dated and their age must be established with detailed reference to the geological record. This procedure leads to some uncertainty. First, the rock layer, or lithostratigraphic unit, from which a specimen was collected must be established. If layers directly above and below that unit have not been directly dated, the relative age, or biostratigraphic unit, of a specimen must be established using index fossils. Finally, the absolute minimum and maximum age of a specimen must be obtained with reference to a numeric timescale, or chronostratigraphic chart. The process of dating fossils is not always straightforward, because the link between litho-, bio- and chronostratigraphy can be challenging to establish, or the stratigraphic provenance of a specimen may be ambiguous (13; 14; 15; 16; 17).

Current applications of the FBD model typically assign specimen ages using the midpoint of the known interval of age uncertainty (e.g. 18) or a random age drawn from that interval (e.g. 19; 20). However, fossil age uncertainty can also be modelled explicitly by placing a prior on the fossil

ages and co-estimating these along with other model parameters (21). Previous authors have demonstrated that different age interpretations can lead to substantial differences in empirical estimates of divergence times in analyses that directly incorporate fossils into the tree (22). In this paper we explore fossil age uncertainty as a potential source of error in FBD analyses using simulated and empirical data, and we describe how various methods of handling age uncertainty can affect the results. Our simulations show that fixing specimen ages can lead to erroneous estimates of divergence times but that incorporating stratigraphic age uncertainty explicitly using a hierarchical modelling approach substantially increases the chances of recovering the correct node ages. An analysis of Cetacea (the clade containing dolphins and whales) reveals that alternative approaches to handling specimen ages have major implications for dating speciation events within a historical context.

## 2 Methods

### 2.1 Simulated datasets

Our simulation study is based on the class Mammalia, which is very well represented in both molecular and paleontological databases. Mammals and their subgroups have also been the subject of a large number of molecular dating studies (23; 24; 25), as well as studies that rely on time-scaled phylogenies (26; 27). Simulated age uncertainty was based on the fossil record of North American mammals, which is relatively complete, has been studied in detail and is stratigraphically well constrained. Thus, the degree of age uncertainty incorporated into our simulations represents a best-case scenario for inferring the divergence times of mammal-like groups.

#### 2.1.1 Simulation of extant species phylogenies and fossil samples

Trees were simulated under a birth-death process using the R package **TreeSim** (28). The speciation rate was set to  $\lambda = 0.15/\text{Myr}$  and the extinction rate to  $\mu = 0.1/\text{Myr}$ , in accordance with estimates from (26) for the mammalian phylogeny. The birth-death process was stopped once  $n_{\text{extant}} = 25$  extant species had been reached. At this stage we rejected trees whose origin was

not between 40 Ma and 100 Ma. This interval broadly encompasses the estimated origin time for many major groups of mammals (27; 24), but avoids simultaneously conditioning on tree age and tip number, which can be problematic (29).

Fossils were then sampled on the complete phylogeny using the R package `FossilSim`, following a Poisson process with a constant rate. The fossilization rate was set to  $\psi = 0.2/\text{Myr}$ , based on estimates of fossil recovery rates among Cenozoic mammals (30). Note that under this process, any number of fossils can be sampled for a given species. We did not filter the fossils further, as the current implementation of the FBD model in BEAST2 is designed for specimen-level data. We rejected phylogenies with less than 4 or more than 125 sampled fossils. A minimum of 4 was chosen to ensure convergence when analyzing the simulated data, while a maximum of 125 was chosen to avoid generating trees with a large number of extinct samples relative to the number of extant samples ( $n = 25$ ), which is not typical in divergence time studies. The sampled tree was then obtained by assuming complete extant species sampling ( $\rho = 1$ ) and discarding all unsampled lineages.

### 2.1.2 Simulation of sequences

Sequences were simulated for the extant species using `seq-gen` (31) via the R package `phyclust` (32). We simulated sequences of length 2000 nucleotides under an HKY+ $\Gamma$  model with 5 rate categories, following the substitution model used in (33). We used a log-normal uncorrelated clock, where the substitution rate for each branch of a given tree was sampled from a log-normal distribution with standard deviation 0.1. The mean of the log-normal distribution was drawn separately for each tree from a gamma distribution. A full list of all parameters used in the sequence simulation can be found in Table 1.

### 2.1.3 Simulation of fossil age uncertainty

The minimum and maximum age of each fossil occurrence was simulated based on the sampling interval ages of North American mammals. These intervals were downloaded from the Paleobiology Database (PBDB) on December 12th, 2017, using the following parameters: time intervals = Mesozoic and Cenozoic, region = North America, scientific name = Mammalia. If a fossil age could be assigned to multiple intervals, a single interval was selected at random by weighting all

possible intervals by their frequency of appearance in the PBDB data. If no intervals appeared in the PBDB data for a simulated fossil, a random interval of fixed length was drawn. This length was fixed to the average length of all intervals present in the PBDB data, i.e. 8 Myr. Thus, the simulated interval for each fossil always included the correct age of the fossil. A visual representation of all the intervals used for simulation is shown in Figure 1.

#### 2.1.4 Bayesian inference

We used the Sampled Ancestors package (34), which provides an implementation of the fossilized birth-death process for the Markov Chain Monte-Carlo (MCMC) software BEAST2 (35), to perform Bayesian phylogenetic inferences on our simulated datasets.

The fossil ages were handled using five different methods, detailed here:

**Correct ages** : the fossil ages are fixed to the true ages as simulated.

**Interval ages** : the fossil ages are not fixed, but are sampled along with the other parameters within the simulated age range.

**Median ages** : the fossil ages are fixed to the midpoint of their simulated age range.

**Random ages** : the fossil ages are fixed to an age sampled uniformly at random inside of their simulated age range.

**Symmetric interval ages** : the fossil ages are not fixed, but are sampled along with the other parameters. Each fossil age is sampled within a symmetric interval around the true age of the fossil. The purpose of this setting was to evaluate the performance and accuracy in the situation where the midpoint of each prior interval was equal to the correct age.

A schematic representation of these different methods can be seen in Figure 2. Note that for the interval age methods, we sample trees as in (21). In particular, we set the probability density of the proposed tree to the FBD probability density if all fossil ages are within their intervals, and 0 otherwise. The effective prior on fossil ages is thus not a uniform prior, as the FBD model already induces a distribution on fossil ages.

In all inferences, fossils were constrained to clades according to the correct tree topology. No sequence data was included for the fossil samples. The substitution model and clock model were

138 set to the models used during simulation, and the priors used can be found in the Supplementary  
139 Materials.

## 140 **2.2 Empirical dataset**

141 To explore the impact of stratigraphic age uncertainty on empirical estimates of divergence  
142 times, we compiled a dataset of Cetacea containing both fossil occurrences and an alignment  
143 of sequences for extant species. This group was chosen based on the availability of a large  
144 molecular alignment representing almost all extant species, in combination with well-curated  
145 and comprehensive stratigraphic occurrence data. This group has also been the focus of a large  
146 number of molecular dating studies (36; 37; 38; 39; 40).

### 147 **2.2.1 Fossil occurrence data**

148 We obtained data on 4473 fossil occurrences from the PBDB on April 5th, 2018, using the  
149 parameter “scientific name = Cetacea”. The full dataset could not be used due to mixing issues,  
150 so we subsampled 10% of the fossils at random, obtaining 448 fossil occurrences. The classification  
151 of taxa into suprageneric ranks was largely based on (41). A list of genera and their taxonomic  
152 membership as used in the subsample is provided in the Supplementary Materials. We used the  
153 minimum and maximum age for each fossil occurrence as recorded in the Paleobiology Database.

### 154 **2.2.2 Alignment**

155 We used the alignment provided by (36), which contains sequences for 6 mitochondrial and 9  
156 nuclear genes for 87 of 89 extant cetacean species. We excluded from our analysis the 3 outgroup  
157 taxa which were present in the original alignment, as our dataset contains no fossils for these  
158 families. The full alignment thus contains 87 sequences with 16,175 characters each.

159 Following (36), we divided this alignment into 28 partitions. The best substitution models for  
160 each partition were selected using bModelTest (42). A complete list of the substitution models  
161 used can be found in the Supplementary Materials.

### 162 **2.2.3 Bayesian inference**

163 Bayesian phylogenetic inference was performed using the same model parameters and priors as  
 164 for the simulated data, with the exception of the substitution model, which was set as specified  
 165 in the previous section. As the correct ages of the fossils in this dataset are unknown, we limited  
 166 our comparison to median ages, random ages and interval ages.

167 Topological constraints were set at both the genus and the family level, following the clas-  
 168 sification from PBDB, so that each genus or family formed a monophyletic clade in the tree.  
 169 Samples whose position could not be determined were not included in any clade constraint, and  
 170 thus could appear anywhere outside of the determined clades.

171 Following the model described in (43) for the analysis of empirical data, we unlinked the  
 172 substitution models and among-site rate variation across partitions but linked the clock model  
 173 and applied partition-specific rate multipliers to account for variation in evolutionary rates.

## 174 **2.3 Data availability**

175 All analyses, pre- and post-processing of the datasets were done using custom R scripts. These  
 176 scripts and the XML configuration files used to run BEAST2 are included in the Supplementary  
 177 Materials.

## 178 **3 Results**

### 179 **3.1 Simulated datasets**

#### 180 **3.1.1 Accuracy**

181 We measured the relative error of the median estimates for the divergence times and FBD model  
 182 parameters obtained using different approaches to handling stratigraphic age uncertainty. We  
 183 also calculated the coverage, i.e the number of analyses (out of 100 trees) in which the true  
 184 parameter value was included in the 95% highest posterior density (HPD) interval. The error  
 185 and coverage of the divergence times for each tree were averaged across all nodes of the extant  
 186 tree, i.e. all nodes that were the most recent common ancestors (MRCA) of extant tips. Results  
 187 for the divergence times, diversification rate and turnover estimates are shown in Figure 3.



Using either interval ages or symmetric interval ages lead to error and coverage values that are very close to the results obtained using the correct age of the fossils. However, median and random ages did much worse than other methods. This is particularly apparent for estimates of divergence times, where error values range from 0.15 to 0.20 for correct, interval and symmetric interval ages, versus 0.57 and 0.74 for median and random ages, respectively. Similarly, the coverage of divergence times is 0.89 and 0.86 for correct and interval ages, respectively, versus 0.34 and 0.29 for median and random ages, respectively. The diversification rate is less sensitive to the choice of fossil ages, but still shows a relative error of 0.42 and a coverage of 0.85 for median ages, compared with 0.18 and 1.0 for interval ages. Median ages result in inaccurate estimates of turnover, with a coverage of 0.13, compared to values above 0.9 for all other methods. Overall, there are important discrepancies between the results obtained using correct ages, interval ages and symmetric interval ages, versus median ages and random ages.

The relative 95% HPD interval widths are shown in Table 2. Sampling fossil ages along with other model parameters (based on the PBDB or symmetric age intervals) did not result in wider HPD intervals than fixing the fossil ages to the truth. Fixing fossil ages to the wrong values (i.e using median ages or random ages) did not have a consistent effect on HPD interval width. For example, HPD intervals were wider for the divergence time estimates but narrower for the diversification rate. This reveals that the better coverage obtained for interval ages compared to median or random ages were not obtained at the expense of precision in the case of divergence times, i.e higher coverage is not simply due to wider HPD intervals.

### 3.1.2 Performance

We evaluated the performance of the different inference methods by calculating the processing time required per effective sample. We used the effective sample sizes for the posterior distribution and for the total height of the tree. The results are shown in Table 3. We observed no clear correlation between sampling or fixing fossil ages and the performance in this dataset.

## 213 3.2 Empirical dataset

214 Figure 4 shows the MCC trees obtained using different methods of fixing ages, restricted to  
 215 extant tips. There are few differences in topology, which is expected as we applied strong  
 216 topological constraints in this analysis. However, divergence time estimates vary considerably  
 217 between different approaches to handling age uncertainty, and is most apparent for older nodes  
 218 in the tree. For instance, the most recent common ancestor (MRCA) of all extant cetaceans  
 219 is 44 Ma old using interval ages, in contrast to 50 and 61 Ma using random and median ages,  
 220 respectively. The relative difference between the median node ages inferred with interval ages  
 221 versus median ages, averaged across all nodes, is 15%. However, there is wide variability; some  
 222 nodes show almost no difference ( $< 1\%$ ), while in other cases the median age estimate obtained  
 223 using median ages is double the estimate obtained using interval ages. The relative length of the  
 224 95% HPD intervals for the divergence time estimates is 52% of the median estimate for interval  
 225 ages, 54% for median ages and 26% for random ages, also averaged across all nodes. Thus using  
 226 random ages lead to much narrower posterior distributions for the divergence time estimates.

227 An example of the strong influence exerted by fixing fossil ages on estimated node ages is  
 228 shown in Figure 5. We can see that the posterior distribution obtained using interval ages is  
 229 much wider. However, when using median or random ages, the age of the node is constrained to  
 230 within a much narrower interval. The fossil specimen imposes a lower bound on the distribution  
 231 that is potentially in conflict with the phylogenetic data and/or other age constraints, resulting  
 232 in a posterior distribution with a strong peak at the lower bound. For this node, the 95% HPD  
 233 interval is of length 2.92 for the interval ages, 3.91 for median ages and 2.65 for random ages.

234 Figure 6 shows a comparison of the estimates of the FBD process parameters obtained using  
 235 different methods of age handling. For these parameters, all estimates show a trend going from  
 236 median to random to interval ages. The diversification rate is most robust to the choice of fossil  
 237 age, as all the HPD intervals overlap. However, we see a trend for an increasing diversification  
 238 rate estimate, from median to random to interval ages. The turnover is estimated to be higher  
 239 and the sampling proportion much lower with median ages than with interval ages. These trends  
 240 in parameter estimates are likely to be in part correlated to the observed differences in divergence  
 241 time estimates. For example, as the number of fossil samples increases with the age of the process

and with the sampling rate, estimating a greater height for the tree leads to lower estimates of sampling proportion and vice-versa. Similarly, as the number of extant species increases with the age of the process and with the diversification rate, estimating a greater height for the tree leads to lower estimates of diversification rates and vice-versa.

## 4 Discussion

The age of fossils is not known precisely and instead is associated with a range of uncertainty that results from the nature of the geological record. Our simulations demonstrate that the popular approach of fixing fossil ages to point estimates within the known interval of uncertainty in molecular dating analysis can lead to erroneous estimates of node ages. Using this strategy <35% of node ages were recovered within the Bayesian 95% HPD intervals. Conversely, explicitly incorporating fossil age uncertainty led to substantially more accurate estimates of node ages and other model parameters. It may be tempting to fix the age of fossils to reduce the computational burden. However, our results based on both the simulated and empirical datasets show that co-estimating fossil ages does not necessarily incur additional computational cost. Unless researchers have extremely good motivation for doing so, fossil ages should not be fixed in divergence time analysis that directly incorporate fossils into the tree. Emphasis on establishing rigorous and transparent calibration information that evolved in the context of node dating should also apply to other approaches to calibration, including inference under the FBD process (17; 44; 22).

The analysis of the cetacean dataset illustrates how strongly estimates of both divergence times and biologically relevant parameters, such as diversification rate, can be affected by the choices made in handling fossil age uncertainty. The difference between the median posterior estimate obtained for the age of Neoceti (crown cetaceans) using fixed median ages versus interval ages is nearly 20 Ma. Furthermore, analysing this dataset with median ages would show a strong discrepancy between the divergence time estimates obtained using the FBD model and the estimates obtained using fossil calibration in the original node dating analysis (36), which estimated the origin of the Neoceti to be 36 Ma. However, accounting for stratigraphic age uncertainty shows that this is not the case: the MRCA age obtained using interval ages matches more closely both with the original analysis and with more recent studies such as (39), which

270 estimated the MRCA age to be 39 Ma. It is not possible to definitively determine which outcome  
271 is closer to the truth in our empirical analysis, but our simulations clearly indicate that estimates  
272 obtained using interval ages should be considered the most reliable.

273 It is worth noting that the average range of age uncertainty associated with fossils included  
274 in our simulations and empirical analysis is relatively small (8 and 4 Myr, respectively). This  
275 reflects our decision to focus on well-studied Cenozoic fauna with extant representatives, but the  
276 fossil record of many taxonomic groups and time periods will be associated with much greater  
277 uncertainty. For example, the age of many pre-Cenozoic deposits are poorly constrained. Thus,  
278 the discrepancies obtained using different age handling methods have the potential to be much  
279 larger than those demonstrated in this study. This may be especially important to consider in  
280 the context of FBD analyses for groups that have no extant representatives.

281 In our experiments, no character data was included for extinct samples, meaning fossil recovery  
282 times can inform the FBD model parameters, but the phylogenetic position of these samples  
283 cannot be estimated. If morphological character data is available for fossils, their phylogenetic  
284 position can also be inferred along with divergence times (43; 45), meaning no taxonomic decisions  
285 have to be made *a priori* by assigning fossils to clades as done here. This could increase the  
286 impact of mishandling fossil age uncertainty, especially since morphological character matrices  
287 available for fossils are typically small (e.g. 50-200 characters).

288 Finally, it is worth emphasising the distinction between the age range associated with fossil  
289 specimens and fossil species. The latter is known as the stratigraphic range of a species, and  
290 represents the interval between the first and last appearance times. Here, we implemented  
291 the specimen-based FBD process, meaning all available specimens were incorporated into the  
292 analysis. Although we note some studies have applied this model to the analysis of stratigraphic  
293 range data, this is not technically appropriate. Instead, stratigraphic ranges should be analysed  
294 under the FBD range process (46), however no implementation in BEAST2 is yet available. We  
295 note that when this model does become available, the uncertainty associated with specimens  
296 representing the ends of stratigraphic ranges should be incorporated into the analysis, rather  
297 than being fixed, otherwise we anticipate similar performance issues to those demonstrated in  
298 this study.

## 299 5 Conclusions

300 In this study we demonstrate that the choice of method for handling fossil age uncertainty  
 301 can have important effects on estimates of species divergence times obtained under the FBD  
 302 process. Our simulation results clearly favour a Bayesian hierarchical approach to handling  
 303 fossil age uncertainty based on the actual age intervals, as opposed to fixing the ages to an  
 304 arbitrary value inside that interval. In addition, our empirical dataset demonstrates that the  
 305 rigid age constraints given by fixed fossil ages can lead to age estimates that are very different  
 306 from those obtained using a traditional node dating approach, whereas a more flexible approach  
 307 to handling fossil ages recovers similar estimates. Thus we strongly recommend against fixing  
 308 fossil ages in FBD analyses. Overall, this work illustrates the critical importance of accurately  
 309 reflecting the available information regarding uncertainty in Bayesian phylogenetic analyses. As  
 310 we demonstrate, discarding this information can have detrimental impacts on the accuracy of  
 311 the results.

## 312 6 Acknowledgements

313 We thank Chi Zhang for advice in setting up the analysis of empirical data. We also thank  
 314 Mark D. Uhen for keeping the cetacean data in the PBDB up to date. JBS is supported in part  
 315 by the European Research Council under the Seventh Framework Programme of the European  
 316 Commission (PhyPD: grant agreement number 335529). RCMW is funded by the ETH Zürich  
 317 Postdoctoral Fellowship and Marie Curie Actions for People COFUND programme.

# References

- [1] Kishino H, Thorne JL, Bruno WJ. Performance of a divergence time estimation method under a probabilistic model of rate evolution. *Molecular Biology and Evolution*. 2001;18(3):352–361.
- [2] Yang Z, Rannala B. Bayesian estimation of species divergence times under a molecular clock using multiple fossil calibrations with soft bounds. *Molecular Biology and Evolution*. 2005;23(1):212–226.
- [3] Drummond AJ, Ho SY, Phillips MJ, Rambaut A. Relaxed phylogenetics and dating with confidence. *PLoS Biology*. 2006;4(5):e88.
- [4] Ho SY, Phillips MJ. Accounting for calibration uncertainty in phylogenetic estimation of evolutionary divergence times. *Systematic Biology*. 2009;58(3):367–380.
- [5] Clarke JT, Warnock RC, Donoghue PC. Establishing a time-scale for plant evolution. *New Phytologist*. 2011;192(1):266–301.
- [6] Warnock RC, Yang Z, Donoghue PC. Exploring uncertainty in the calibration of the molecular clock. *Biology Letters*. 2012;8(1):156–159.
- [7] Heath TA. A hierarchical Bayesian model for calibrating estimates of species divergence times. *Systematic Biology*. 2012;61(5):793–809.
- [8] Joyce WG, Parham JF, Lyson TR, Warnock RC, Donoghue PC. A divergence dating analysis of turtles using fossil calibrations: an example of best practices. *Journal of Paleontology*. 2013;87(4):612–634.
- [9] Heled J, Drummond AJ. Calibrated tree priors for relaxed phylogenetics and divergence time estimation. *Systematic Biology*. 2011;61(1):138–149.
- [10] Warnock RC, Parham JF, Joyce WG, Lyson TR, Donoghue PC. Calibration uncertainty in molecular dating analyses: there is no substitute for the prior evaluation of time priors. *Proceedings of the Royal Society of London B: Biological Sciences*. 2015;282(1798):20141013.

- 343 [11] Stadler T. Sampling-through-time in birth–death trees. *Journal of Theoretical Biology*.  
344 2010;267(3):396–404.
- 345 [12] Heath TA, Huelsenbeck JP, Stadler T. The fossilized birth-death process for coherent  
346 calibration of divergence-time estimates. *Proceedings of the National Academy of Sciences*  
347 of the United States of America. 2014 jul;111(29):E2957–66. Available from: [http://www.](http://www.ncbi.nlm.nih.gov/pubmed/25009181)  
348 [ncbi.nlm.nih.gov/pubmed/25009181](http://www.ncbi.nlm.nih.gov/pubmed/25009181)[http://www.pnas.org/content/111/29/E2957.](http://www.pnas.org/content/111/29/E2957.abstract.html?etoc)  
349 [abstract.html?etoc](http://www.pnas.org/cgi/doi/10.1073/pnas.1319091111)<http://www.pnas.org/cgi/doi/10.1073/pnas.1319091111>[http:](http://www.pubmedcentral.nih.gov/articlerender.fcgi?artid=PMC4115571)  
350 [//www.pubmedcentral.nih.gov/articlerender.fcgi?artid=PMC4115571](http://www.pubmedcentral.nih.gov/articlerender.fcgi?artid=PMC4115571).
- 351 [13] Erwin DH. Dates and rates: temporal resolution in the deep time stratigraphic record.  
352 *Annual Review of Earth and Planetary Sciences*. 2006;34:569–590.
- 353 [14] Reisz RR, Müller J. Molecular timescales and the fossil record: a paleontological perspective.  
354 *Trends in Genetics*. 2004;20(5):237–241.
- 355 [15] Benton MJ, Donoghue PC. Paleontological evidence to date the tree of life. *Molecular*  
356 *Biology and Evolution*. 2006;24(1):26–53.
- 357 [16] Benton M, Donoghue P, Asher R. Calibrating and constraining molecular clocks. *The*  
358 *Timetree of Life*. 2009;p. 35–86.
- 359 [17] Parham JF, Donoghue PC, Bell CJ, Calway TD, Head JJ, Holroyd PA, et al. Best practices  
360 for justifying fossil calibrations. *Systematic Biology*. 2011;61(2):346–359.
- 361 [18] Larabee FJ, Fisher BL, Schmidt CA, Matos-Maraví P, Janda M, Suarez AV. Molecu-  
362 lar phylogenetics and diversification of trap-jaw ants in the genera *Anochetus* and *Odon-*  
363 *tomachus* (Hymenoptera: Formicidae). *Molecular Phylogenetics and Evolution*. 2016  
364 oct;103:143–154. Available from: [https://www.sciencedirect.com/science/article/](https://www.sciencedirect.com/science/article/pii/S1055790316301804)  
365 [pii/S1055790316301804](https://www.sciencedirect.com/science/article/pii/S1055790316301804){#}s0010.
- 366 [19] Close RA, Johanson Z, Tyler JC, Harrington RC, Friedman M. Mosaicism in a new Eocene  
367 pufferfish highlights rapid morphological innovation near the origin of crown tetraodontif-  
368 orms. *Palaeontology*. 2016 jul;59(4):499–514. Available from: [http://doi.wiley.com/10.](http://doi.wiley.com/10.1111/pala.12245)  
369 [1111/pala.12245](http://doi.wiley.com/10.1111/pala.12245).

- 370 [20] Grimm GW, Kapli P, Bomfleur B, McLoughlin S, Renner SS. Using More Than the Old-  
371 est Fossils: Dating Osmundaceae with Three Bayesian Clock Approaches. *Systematic*  
372 *Biology*. 2015 may;64(3):396–405. Available from: [https://academic.oup.com/sysbio/](https://academic.oup.com/sysbio/article-lookup/doi/10.1093/sysbio/syu108)  
373 [article-lookup/doi/10.1093/sysbio/syu108](https://academic.oup.com/sysbio/article-lookup/doi/10.1093/sysbio/syu108).
- 374 [21] Drummond AJ, Stadler T. Bayesian phylogenetic estimation of fossil ages. *Philosophical*  
375 *Transactions of the Royal Society B: Biological Sciences*. 2016;371(1699):20150129.
- 376 [22] O'Reilly JE, dos Reis M, Donoghue PC. Dating tips for divergence-time estimation. *Trends*  
377 *in Genetics*. 2015;31(11):637–650.
- 378 [23] Bininda-Emonds OR, Cardillo M, Jones KE, MacPhee RD, Beck RM, Grenyer R, et al. The  
379 delayed rise of present-day mammals. *Nature*. 2007;446(7135):507.
- 380 [24] dos Reis M, Inoue J, Hasegawa M, Asher RJ, Donoghue PC, Yang Z. Phylogenomic  
381 datasets provide both precision and accuracy in estimating the timescale of placental  
382 mammal phylogeny. *Proceedings of the Royal Society of London B: Biological Sciences*.  
383 2012;279(1742):3491–3500.
- 384 [25] Close RA, Friedman M, Lloyd GT, Benson RB. Evidence for a mid-Jurassic adaptive  
385 radiation in mammals. *Current Biology*. 2015;25(16):2137–2142.
- 386 [26] Stadler T. Mammalian phylogeny reveals recent diversification rate shifts. *Proceedings of the*  
387 *National Academy of Sciences of the United States of America*. 2011 apr;108(15):6187–6192.
- 388 [27] Meredith RW, Janecka JE, Gatesy J, Ryder OA, Fisher CA, Teeling EC, et al. Impacts  
389 of the Cretaceous Terrestrial Revolution and KPg extinction on mammal diversification.  
390 *Science*. 2011;p. 1211028.
- 391 [28] Stadler T. Simulating Trees with a Fixed Number of Extant Species. *Systematic Biology*.  
392 2011;60(5):676–684. Available from: <http://dx.doi.org/10.1093/sysbio/syr029>.
- 393 [29] Pennell MW, Sarver BA, Harmon LJ. Trees of unusual size: biased inference of early bursts  
394 from large molecular phylogenies. *PloS One*. 2012;7(9):e43348.



- 395 [30] Wagner PJ, Marcot JD. Modelling distributions of fossil sampling rates over time, space and  
396 taxa: assessment and implications for macroevolutionary studies. *Methods in Ecology and*  
397 *Evolution*. 2013;4(8):703–713. Available from: [http://dx.doi.org/10.1111/2041-210X.](http://dx.doi.org/10.1111/2041-210X.12088)  
398 12088.
- 399 [31] Rambaut A, Grass NC. Seq-Gen: an application for the Monte Carlo simulation of DNA  
400 sequence evolution along phylogenetic trees. *Bioinformatics*. 1997;13(3):235–238. Available  
401 from: [+http://dx.doi.org/10.1093/bioinformatics/13.3.235](http://dx.doi.org/10.1093/bioinformatics/13.3.235).
- 402 [32] Chen WC. Overlapping Codon Model, Phylogenetic Clustering, and Alternative Partial  
403 Expectation Conditional Maximization Algorithm. PhD Diss, Iowa Stat University. 2011;.
- 404 [33] Warnock RCM, Yang Z, Donoghue PCJ. Testing the molecular clock using mechanis-  
405 tic models of fossil preservation and molecular evolution. *Proceedings of the Royal So-*  
406 *ciety of London B: Biological Sciences*. 2017;284(1857). Available from: [http://rspb.](http://rspb.royalsocietypublishing.org/content/284/1857/20170227)  
407 [royalsocietypublishing.org/content/284/1857/20170227](http://rspb.royalsocietypublishing.org/content/284/1857/20170227).
- 408 [34] Gavryushkina A, Welch D, Stadler T, Drummond AJ. Bayesian Inference of Sampled An-  
409 cestor Trees for Epidemiology and Fossil Calibration. *PLOS Computational Biology*. 2014  
410 12;10(12):1–15. Available from: <https://doi.org/10.1371/journal.pcbi.1003919>.
- 411 [35] Bouckaert R, Heled J, Kühnert D, Vaughan T, Wu CH, Xie D, et al. BEAST 2: A Soft-  
412 ware Platform for Bayesian Evolutionary Analysis. *PLOS Computational Biology*. 2014  
413 04;10(4):1–6. Available from: <https://doi.org/10.1371/journal.pcbi.1003537>.
- 414 [36] Steeman ME, Hebsgaard MB, Fordyce RE, Ho SYW, Rabosky DL, Nielsen R, et al. Ra-  
415 diation of Extant Cetaceans Driven by Restructuring of the Oceans. *Systematic Biology*.  
416 2009;58(6):573–585. Available from: <http://dx.doi.org/10.1093/sysbio/syp060>.
- 417 [37] McGowen MR, Spaulding M, Gatesy J. Divergence date estimation and a comprehensive  
418 molecular tree of extant cetaceans. *Molecular Phylogenetics and Evolution*. 2009;53(3):891–  
419 906.
- 420 [38] Slater GJ, Price SA, Santini F, Alfaro ME. Diversity versus disparity and the radiation

- of modern cetaceans. *Proceedings of the Royal Society of London B: Biological Sciences*. 2010;277(1697):3097–3104.
- [39] Marx FG, Fordyce RE. Baleen boom and bust: a synthesis of mysticete phylogeny, diversity and disparity. *Royal Society Open Science*. 2015;2(4):140434.
- [40] Slater GJ, Goldbogen JA, Pyenson ND. Independent evolution of baleen whale gigantism linked to Plio-Pleistocene ocean dynamics. *Proceedings of the Royal Society of London B: Biological Sciences*. 2017;284(1855):20170546.
- [41] Marx F, Lambert O, Uhen MD. *Cetacean Paleobiology*. Wiley-Blackwell; 2016.
- [42] Bouckaert RR, Drummond AJ. bModelTest: Bayesian phylogenetic site model averaging and model comparison. *BMC Evolutionary Biology*. 2017 Feb;17(1):42. Available from: <https://doi.org/10.1186/s12862-017-0890-6>.
- [43] Zhang C, Stadler T, Klopstein S, Heath TA, Ronquist F. Total-evidence dating under the fossilized birth–death process. *Systematic Biology*. 2015;65(2):228–249.
- [44] Ksepka DT, Parham JF, Allman JF, Benton MJ, Carrano MT, Cranston KA, et al. The fossil calibration database – a new resource for divergence dating. *Systematic Biology*. 2015;64(5):853–859.
- [45] Gavryushkina A, Heath TA, Ksepka DT, Stadler T, Welch D, Drummond AJ. Bayesian total-evidence dating reveals the recent crown radiation of penguins. *Systematic Biology*. 2017;66(1):57–73.
- [46] Stadler T, Gavryushkina A, Warnock RCM, Drummond AJ, Heath TA. The fossilized birth-death model for the analysis of stratigraphic range data under different speciation modes. *Journal of Theoretical Biology*. 2018 jun;447:41–55. Available from: <https://www.sciencedirect.com/science/article/pii/S002251931830119X>.

| Parameter                                             | Value                                          |
|-------------------------------------------------------|------------------------------------------------|
| Mean substitution rate                                | $\sim \text{Gamma}(\alpha = 2, \beta = 2)/100$ |
| Branch-specific substitution rate                     | $\sim \text{LogNormal}(\text{mean rate}, 0.1)$ |
| Number of rate categories                             | 5                                              |
| Shape of the gamma distribution on rates ( $\alpha$ ) | 0.25                                           |
| Transition/transversion ratio ( $\kappa$ )            | 5                                              |
| Base frequencies                                      | 0.25, 0.25, 0.25, 0.25                         |

Table 1: List of all parameter values used to simulate sequences

| Estimate             | Correct age | Interval ages | Median age | Random age | Symmetric ages |
|----------------------|-------------|---------------|------------|------------|----------------|
| Divergence times     | 0.69        | 0.76          | 1.05       | 1.29       | 0.72           |
| Diversification rate | 1.60        | 1.58          | 1.18       | 1.16       | 1.67           |
| Turnover             | 0.87        | 0.91          | 0.36       | 0.78       | 0.92           |

Table 2: Average relative width of the 95% HPD intervals obtained for different estimates using different methods. The relative width is calculated as the width of the HPD interval divided by the true value.

| time/ESS     | Correct age | Median age | Interval ages | Random age | Symmetric ages |
|--------------|-------------|------------|---------------|------------|----------------|
| Posterior    | 188.2       | 36.8       | 163.9         | 131.7      | 150.4          |
| Total length | 12.7        | 15.8       | 22.1          | 26.0       | 26.2           |

Table 3: Average performance of the MCMC using different age handling methods. The performance is calculated as the CPU time (in seconds) per effective sample of the posterior distribution and of the total length of the tree.

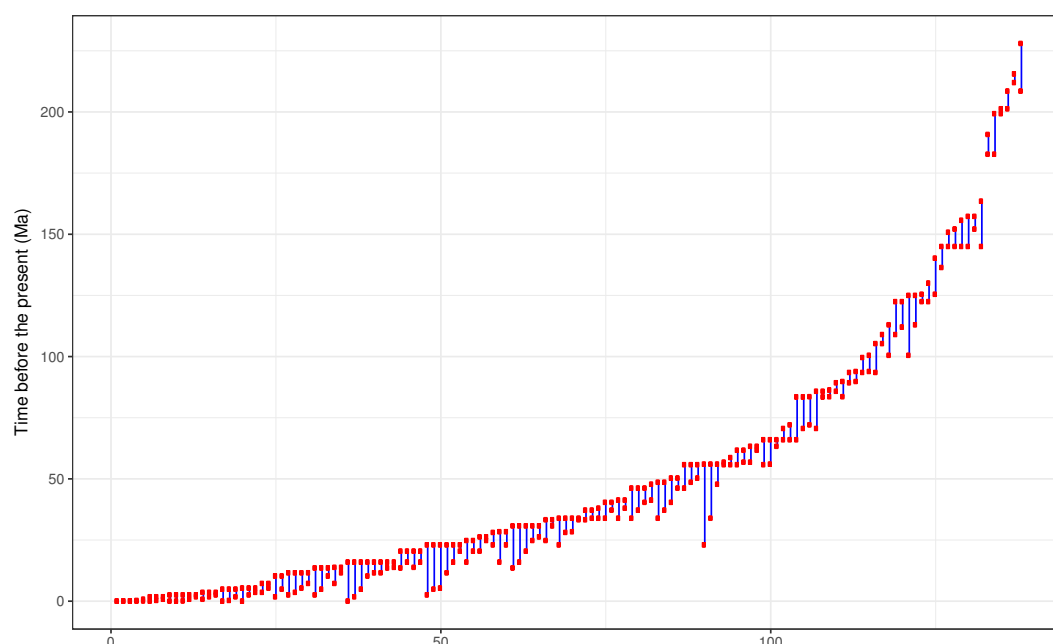

Figure 1: Representation of the age intervals obtained from PBDB for North American mammals sampled during the Mesozoic and Cenozoic. Intervals are ordered by the maximum age of the range, from youngest to oldest.

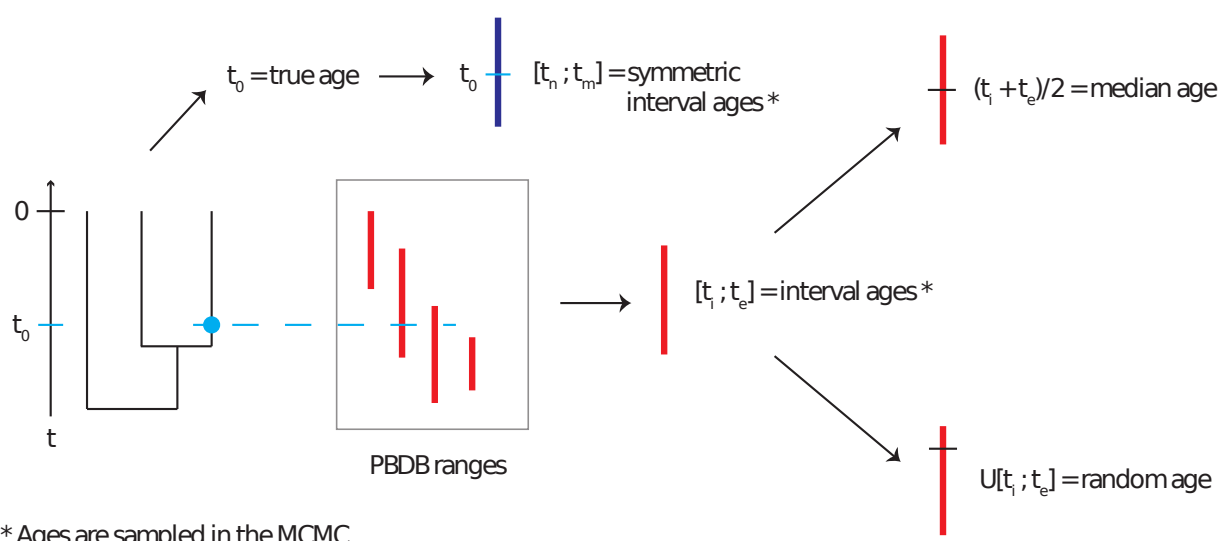

Figure 2: Representation of the age uncertainty simulation process. Phylogenies with fossils are simulated according to a birth-death-fossilization process. The correct age of each fossil is used to draw an age interval for that fossil from the set obtained from PBDB. This age interval is then used as the basis for the median and random age assignment. A symmetric age interval is also drawn from the correct age.

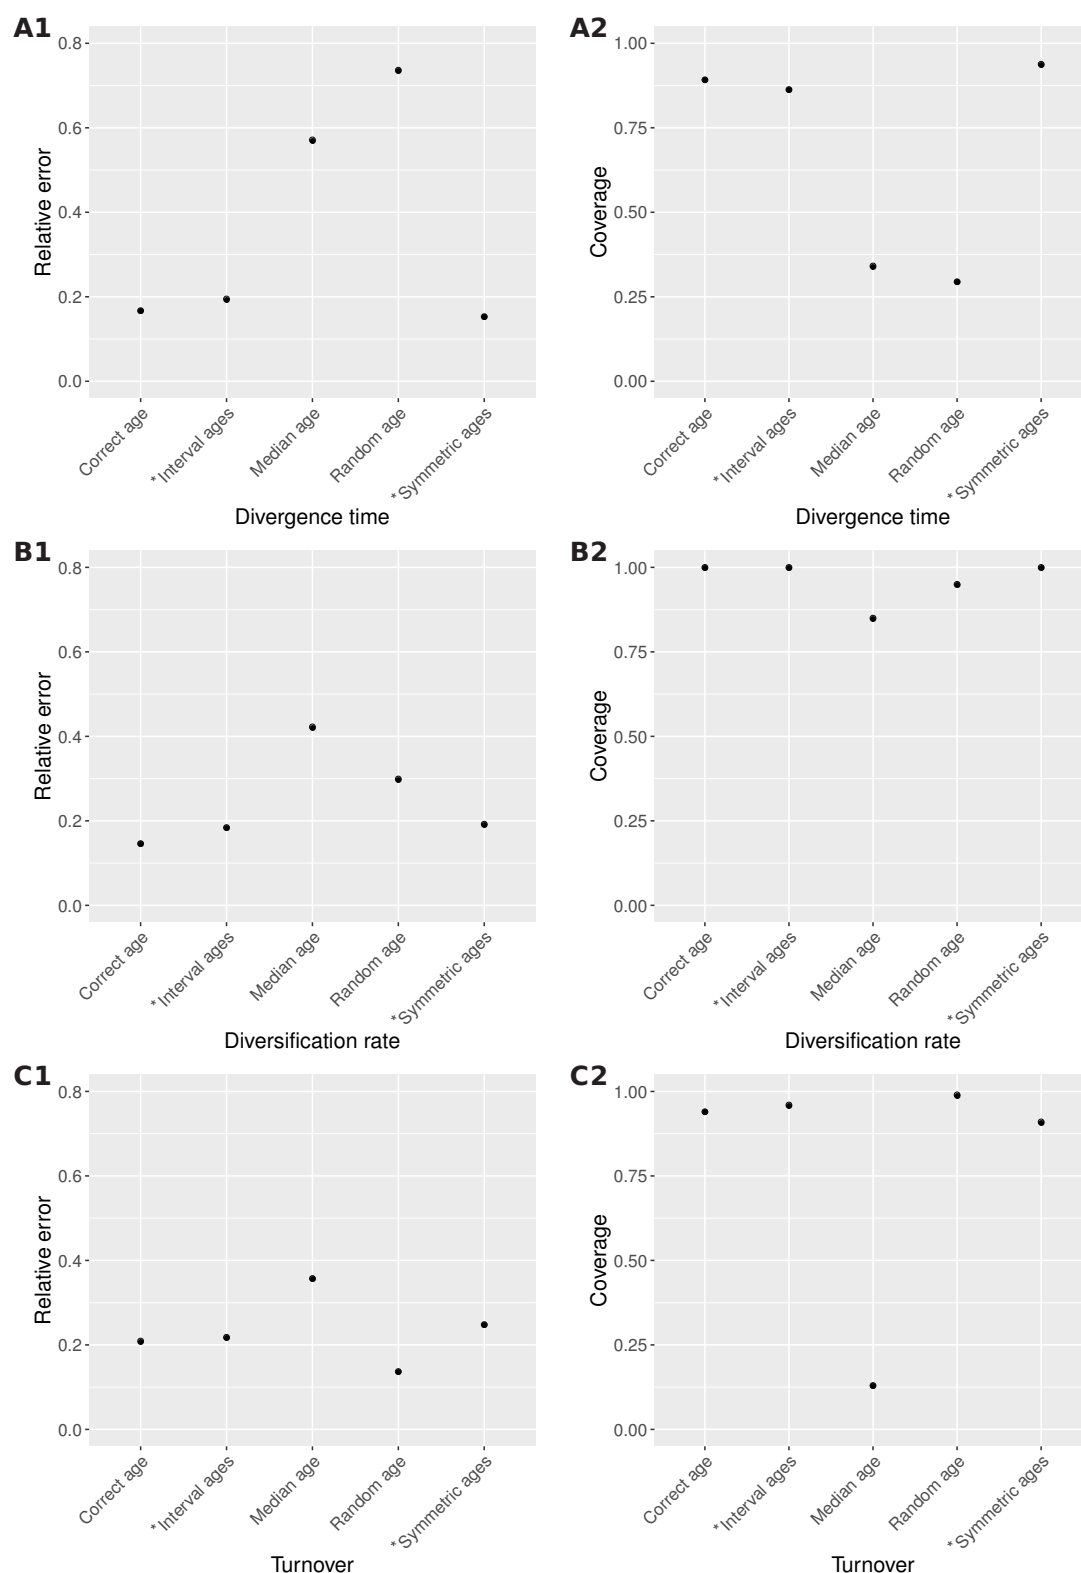

Figure 3: Average relative error of the median estimate (column 1) and 95% HPD coverage (column 2) achieved by different age handling methods for the following parameters: divergence times of extant species (A), diversification rate (B), and turnover (C). Ages sampled as part of the MCMC are marked by (\*).

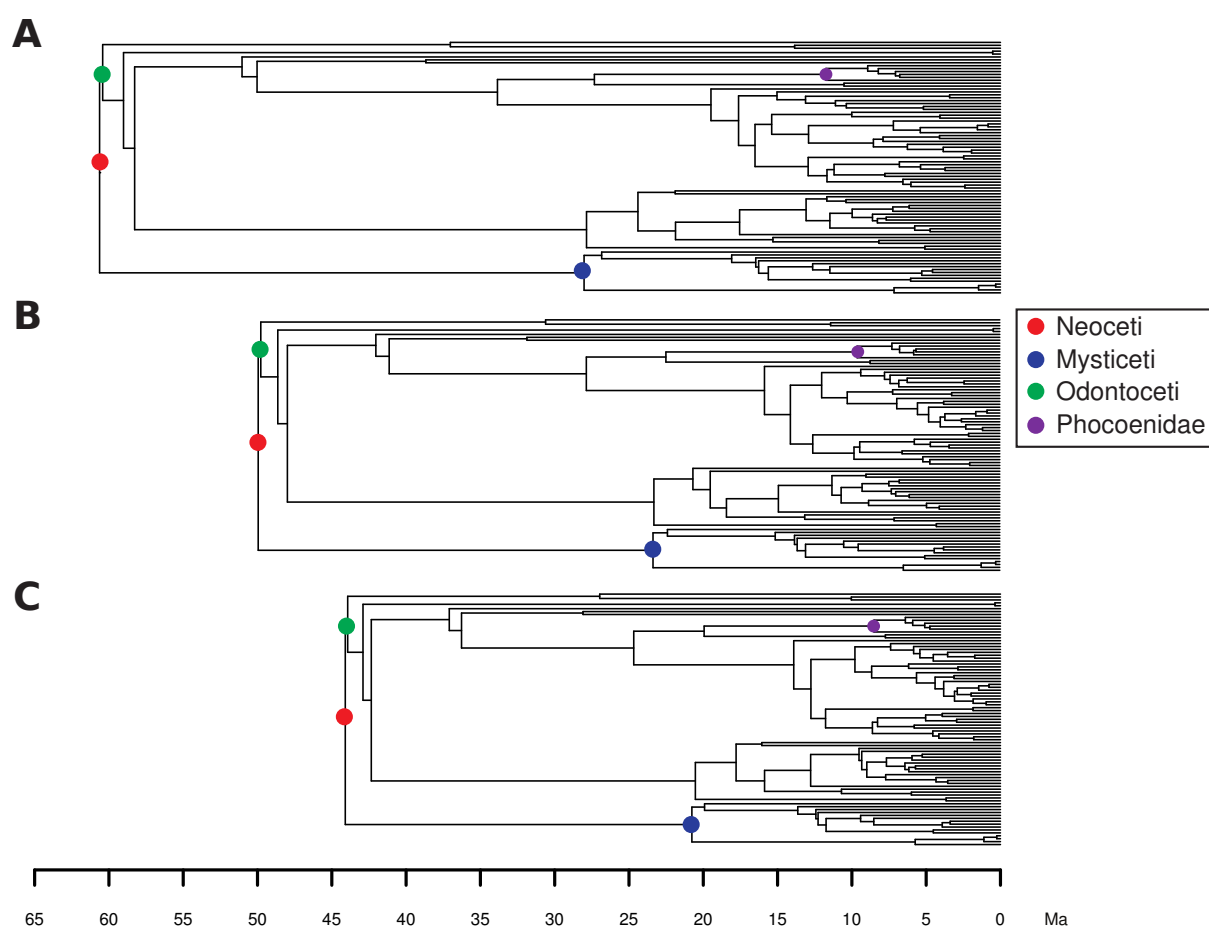

Figure 4: MCC trees inferred for the Cetacea dataset using the FBD process with fossil ages fixed to median ages (A), random ages (B) or sampled within the known interval of uncertainty (C). The major clades and the clade shown in Figure 5 are highlighted.

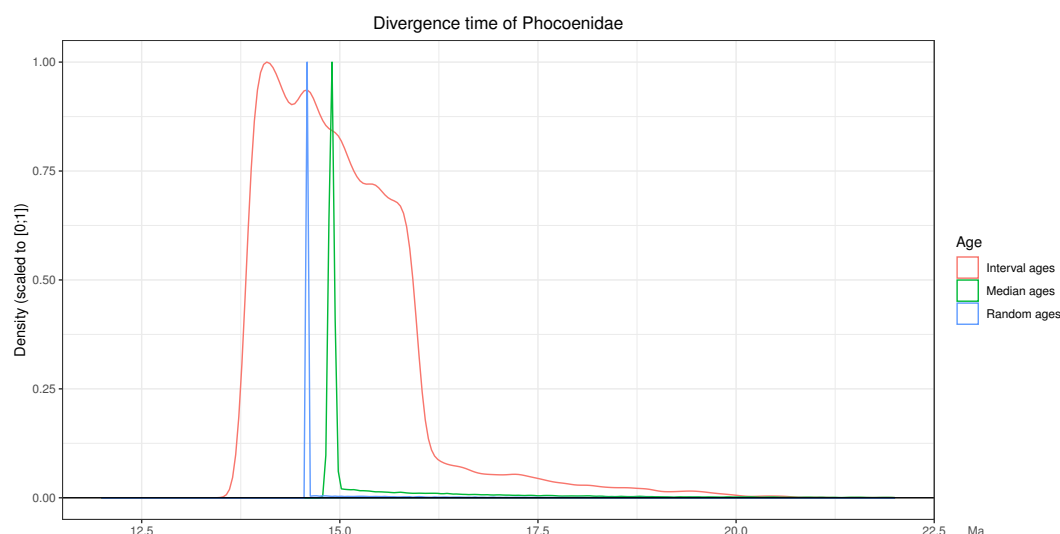

Figure 5: Posterior density obtained for the most recent common ancestor of the family Phocoenidae in the Cetacea dataset using the FBD process with fossil ages fixed to median ages, random ages or sampled within the known interval of uncertainty. The densities were scaled to the interval  $[0; 1]$ .

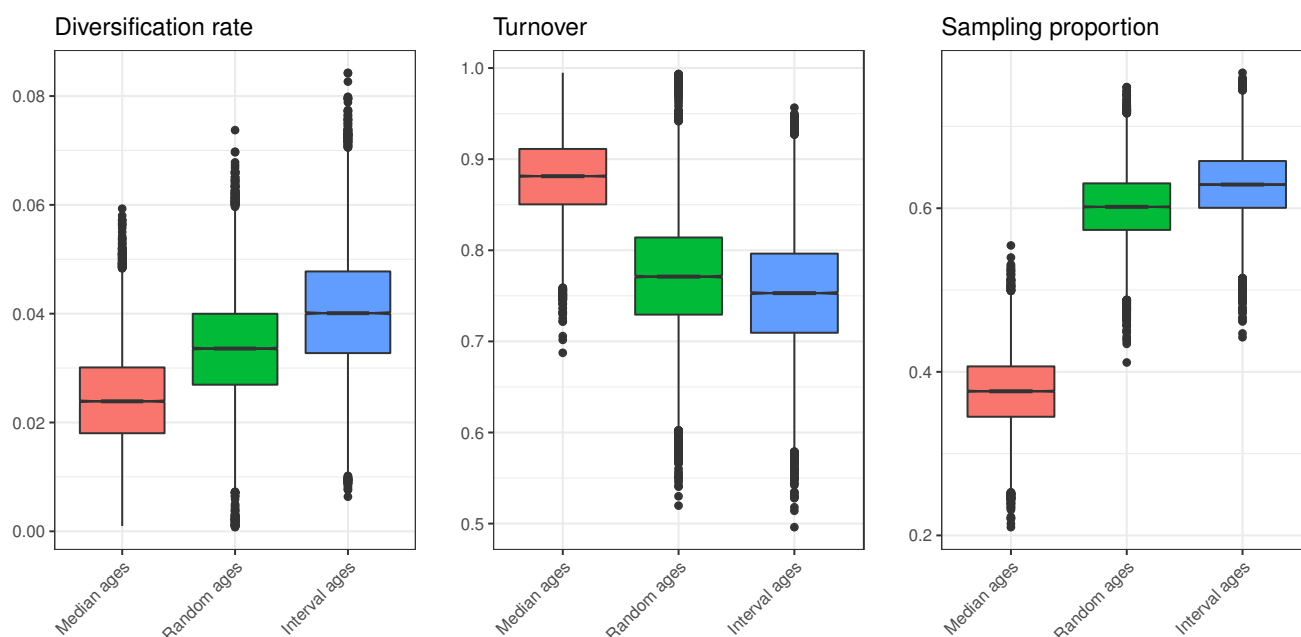

Figure 6: Estimates of the diversification rate, turnover and sampling proportion obtained for the Cetacea dataset using the FBD process with fossil ages fixed to median ages, random ages or sampled within the known interval of uncertainty.
